# Supplementary material for: Functional Crosstalk between PCSK9 Internalization and Pro-Inflammatory Activation in Human Macrophages: Role of Reactive Oxygen Species Release
Source: MDPI journal article supplement (doi:10.3390/ijms23169114), 2022-08-14
Supplement: s1 [file s1]

**Supplementary tables:**

**Table S1:** Primary and secondary antibodies used in Western Blot assays.

| <b>Antibody</b>                       | <b>Supplier</b>     | <b>Reference</b> |
|---------------------------------------|---------------------|------------------|
| Anti-PCSK9                            | Abcam               | Ab181142         |
| Anti-TLR4                             | Santa Cruz Biotech. | Sc-293072        |
| Anti-P-p38 (Thr180/Tyr182)            | Cell Signaling      | #4511            |
| Anti-p38                              | Cell Signaling      | #8690            |
| Anti-vinculin                         | Cell signaling      | #18799           |
| Anti-caspase-1 p10                    | Cell Signaling      | #3866 AF4022     |
| Anti-cleaved caspase-3                | Cell Signaling      | #9664            |
| Anti-I $\kappa$ B- $\alpha$           | Cell Signaling      | #9242            |
| Anti-P-I $\kappa$ B- $\alpha$ (Ser32) | Cell Signaling      | #2859            |
| Anti-P-p65 (Ser536)                   | Cell Signaling      | #3033            |
| Anti-p65                              | Cell Signaling      | #8242            |
| Anti- $\beta$ -actin                  | Sigma               | A5441            |
| Anti-rabbit IgG                       | Bio-Rad             | #1706515         |
| Anti-mouse IgG                        | Sigma               | A-4416           |
| Anti-goat IgG                         | Sigma               | A-5420           |

**Table S2.** Specific primer sequences used in qRT-PCR assay (sequences; 5'–3').

| Gen                    | Forward                   | Reverse                  |
|------------------------|---------------------------|--------------------------|
| Human primer sequences |                           |                          |
| <b><i>ABCA1</i></b>    | ACCCACCCTATGAACAACATGA    | GAGTCGGGTAACGGAAACAGG    |
| <b><i>ABCG1</i></b>    | CGTGCGCTTTGTGCTGTTT       | CCACTGTAGGTACGTGGGGAT    |
| <b><i>CD36</i></b>     | CTTTGGCTTAATGAGACTGGGAC   | GCAACAAACATCACCACACCA    |
| <b><i>CYBB</i></b>     | ACCGGGTTTATGATATTCCACCT   | GATTTCGACAGACTGGCAAGA    |
| <b><i>FASN</i></b>     | AAGGACCTGTCTAGGTTTGATGC   | TGGCTTCATAGGTGACTTCCA    |
| <b><i>HMGCR</i></b>    | TGATTGACCTTTCCAGAGCAAG    | CTAAAATTCGCATTCCACGAGC   |
| <b><i>IL1B</i></b>     | TCGAGGCACAAGGCACAACAGG    | GCCATGGCTGCTTCAGACACTTGA |
| <b><i>ITGAM</i></b>    | GCCTTGACCTTATGTCATGGG     | CCTGTGCTGTAGTCGCACT      |
| <b><i>LDLR</i></b>     | TCTGCAACATGGCTAGAGACT     | TCCAAGCATTGTTGGTCCC      |
| <b><i>NLRP3</i></b>    | GATCTTCGCTGCCATCAACAG     | CGTGCATTATCTGAACCCAC     |
| <b><i>PCSK9</i></b>    | GGACTCCTCTGTCTTTGCCC      | TCCCGGTGGTCACTCTGTAT     |
| <b><i>SREBP1</i></b>   | CGCAACCATCTTGGCAACAGT     | CGCTTCTCAATGGCGTTGT      |
| <b><i>TNF</i></b>      | GAGGCCAAGCCCTGGTATG       | CGGGCCGATTGATCTCAGC      |
| <b><i>36B4</i></b>     | GGATTACACCTTCCCACTTGC     | GCCACAAAGGCAGATGGATCA    |
| Mouse primer sequences |                           |                          |
| <b><i>Il1b</i></b>     | AGAAGCTGTGGCAGCTACCTG     | GGAAAAGAAGGTGCTCATGTCC   |
| <b><i>Pcsk9</i></b>    | GCCCATCGGGAGATTGAGG       | TTCCCTTGACAGTTGAGCACA    |
| <b><i>Tnf</i></b>      | CATCTTCTCAAAATTCGAGTGACAA | TGGGAGTAGACAAGGTACAACCC  |
| <b><i>36b4</i></b>     | ACTGGTCTAGGACCCGAGAAG     | TCCACCTTGTCTCCAGTCT      |

Supplementary figures:

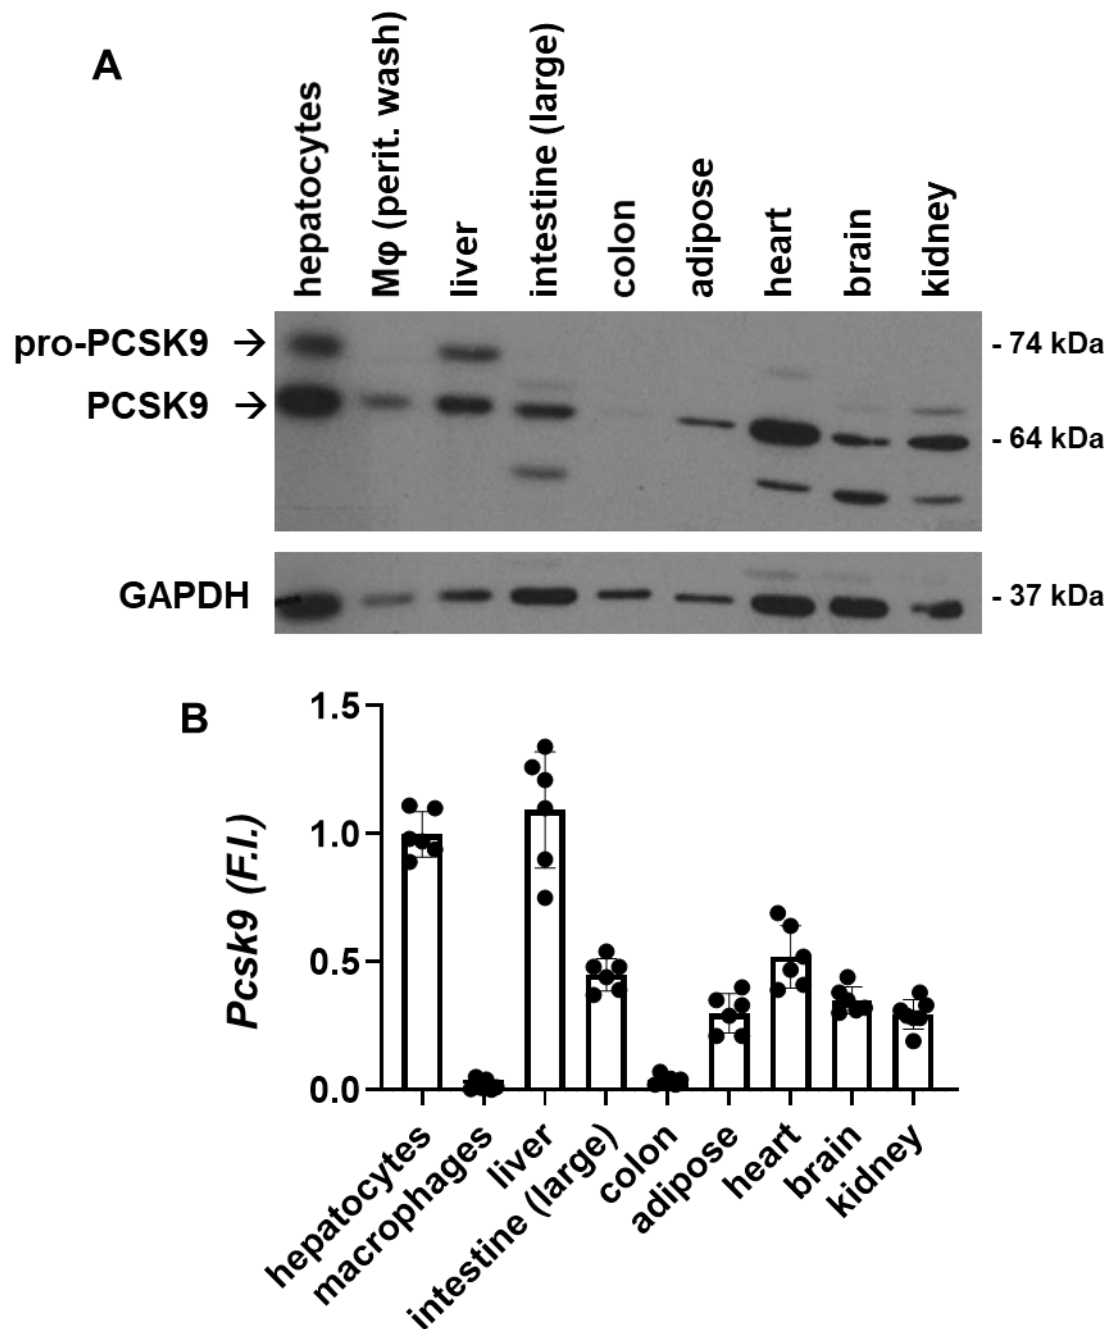

**Figure S1. Intracellular content of PCSK9 and mRNA levels of *Pcsk9* in murine tissues.** (A) Quantification of PCSK9 in different murine tissues. Mice were fed ad libitum and tissues and cells were prepared, homogenized and the protein levels were determined by Western blot. (B) Determination of mRNA levels of *Pcsk9* in the corresponding samples analyzed in panel A. Results show a representative blot (A) or the mean  $\pm$  SD of the corresponding mRNA levels of 6 independent preparations, using *36b4* as internal control, and referencing hepatocyte content.

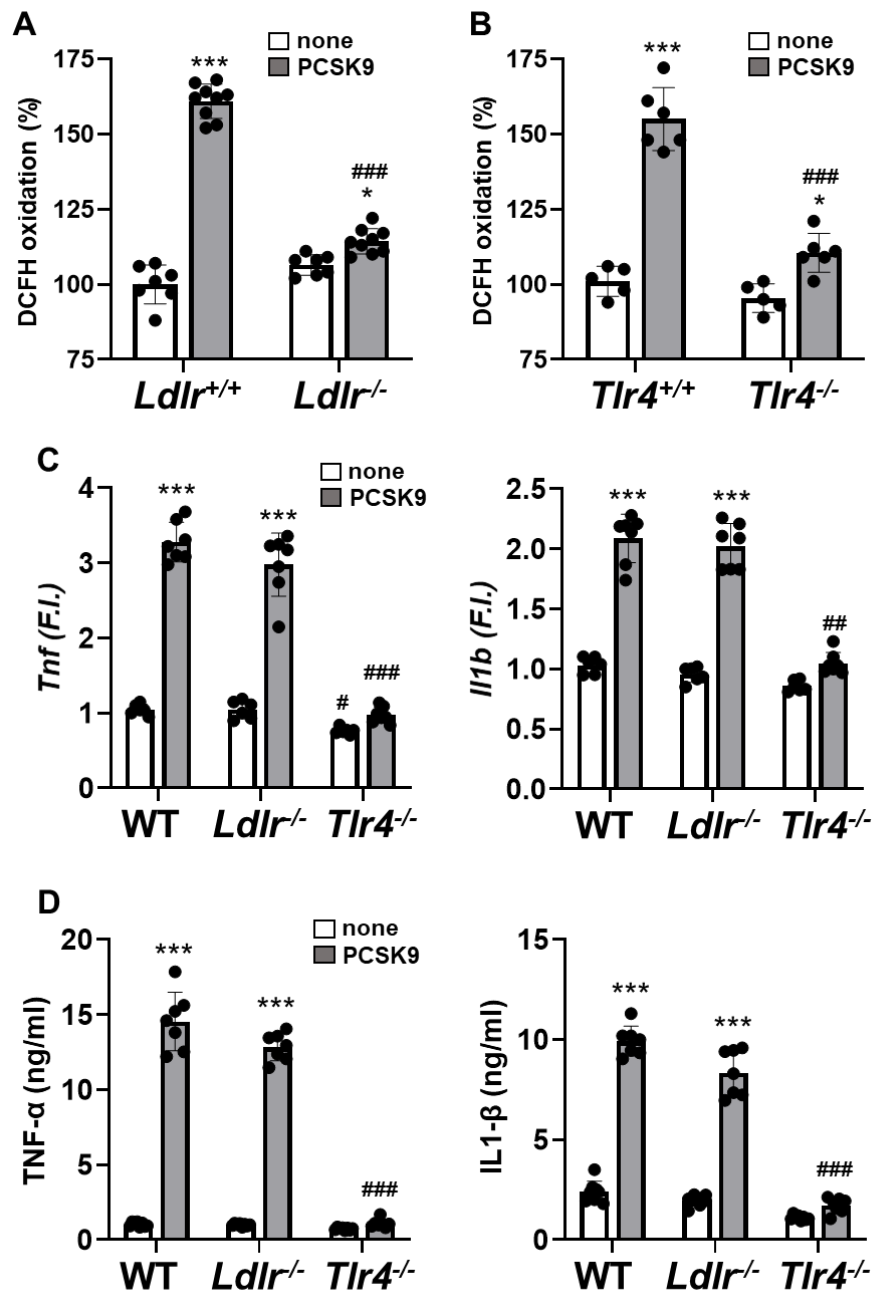

**Figure S2. Effect of PCSK9 on the production of ROS and proinflammatory cytokines in elicited peritoneal macrophages from wild-type (WT), *Ldlr*<sup>-/-</sup> and *Tlr4*<sup>-/-</sup> mice.** (A-B) Peritoneal macrophages from the indicated mice genotypes were treated for 18h with 1  $\mu$ g/ml of recombinant PCSK9. The oxidation of DCFH was measured as an indication of ROS synthesis. (C) The mRNA levels of *Tnf* and *Il1b*, and (D) the release of TNF- $\alpha$  and IL-1 $\beta$  to the culture medium were determined in peritoneal macrophages from mice of the indicated genotype treated for 4h with 1  $\mu$ g/ml of recombinant PCSK9. Data show the mean  $\pm$  SD of macrophages from 5 mice of each genotype, assayed per triplicate. \* $P$ <0.05; \*\*\* $P$ <0.001 vs. the corresponding condition in the absence of PCSK9. # $P$ <0.05; ## $P$ <0.005; ### $P$ <0.001 vs. the corresponding WT counterparts.
